# Supplementary material for: Subcellular Feature-Based Classification of α and β Cells Using Soft X-ray Tomography
Source: Cells. 2024 May 18;13(10):869. doi: 10.3390/cells13100869 (PMC11119489; doi:10.3390/cells13100869)
Supplement: Supplementary file 1 [file cells-13-00869-s001.zip › Supplemental Tables.xlsx]

## Sheet: Logistic Regression
Combination	Accuracy	Precision	Recall	F1	ROC	Mean	Std Dev	Skew	Kurt	Diameter
1	0.680576	0.705592	0.532919	0.607219	0.752766	0.091241	0.0749007	0.0283445	0.00054772	0.0160208
2	0.659385	0.676642	0.50559	0.578742	0.722912	0.0857339	0.0787948	0.0460625	0.00022826	0.0405387
3	0.563725	0.847436	0.410559	0.553138	0.765934	0.0674485	0.0910795	0.0263777	0.0003052	0.0310429
4	0.804896	0.728891	0.788199	0.757386	0.882124	0.0837065	0.0836122	0.0151765	0.0001414	0.0464722
5	0.699893	0.553437	0.685093	0.612268	0.77472	0.108399	0.101452	0.00366636	9.64832e-05	0.0257128
6	0.81864	0.838256	0.740373	0.78628	0.910329	0.0654257	0.107331	0.0189354	0.00050433	0.0354867
7	0.883978	0.832057	0.877019	0.853946	0.945952	0.0763395	0.0736535	0.021441	0.00051835	0.0511286
8	0.734286	0.822909	0.592834	0.689176	0.825832	0.0854823	0.0159616	0.0482539	0.00041519	0.0715505
9	0.641337	0.699765	0.485885	0.573534	0.704452	0.0778388	0.0140267	0.0709177	0.00069211	0.121303
10	0.563806	0.884571	0.420195	0.569746	0.773239	0.0656713	0.0241367	0.0491543	0.00083686	0.105092
11	0.743805	0.719191	0.636808	0.675497	0.829876	0.0775792	0.0125328	0.0345961	0.0016202	0.138242
12	0.739718	0.6425	0.697611	0.668922	0.825892	0.104747	0.0321998	0.021125	0.00141484	0.0973313
13	0.772142	0.854031	0.638436	0.730662	0.891252	0.0666389	0.0238658	0.0407804	0.00125122	0.124148
14	0.7438	0.721261	0.63355	0.674566	0.833341	0.0737053	0.00295393	0.0455953	0.00147696	0.167469
15	0.88705	0.807574	0.862295	0.834038	0.949583	0.0800743	0.0635286	0.0474252	0.00013272	0.0264555
16	0.831897	0.730175	0.774863	0.751856	0.896986	0.0652655	0.060177	0.0715044	0.00061947	0.0531858
17	0.756988	0.87907	0.619672	0.726923	0.878969	0.0534044	0.0749863	0.0427828	0.00207355	0.0475223
18	0.873848	0.687648	0.955191	0.799634	0.96061	0.0692771	0.0671322	0.0312158	0.00132348	0.0639376
19	0.826768	0.574886	0.960656	0.719313	0.947807	0.102315	0.0740291	0.0152633	0.00074683	0.0474701
20	0.910354	0.809614	0.938798	0.869433	0.964824	0.0498534	0.0820226	0.0347463	0.00039989	0.0557185
21	0.89504	0.727123	0.963934	0.828947	0.972675	0.0618726	0.0544351	0.043758	0.00132323	0.0734623
22	0.718761	0.556723	0.602273	0.578603	0.753421	0.0870622	0.0670966	0.0446575	0.0006184	0.013649
23	0.702801	0.531469	0.604545	0.565657	0.738779	0.0815993	0.073161	0.0562845	0.00026508	0.0315882
24	0.666473	0.765112	0.503409	0.607265	0.75846	0.0684949	0.094397	0.0377335	0.00097186	0.0278458
25	0.82863	0.610311	0.914773	0.732151	0.921854	0.0872101	0.0711259	0.0241491	0.00050121	0.0471591
26	0.718471	0.432756	0.822727	0.567176	0.824092	0.112913	0.0895196	0.0127685	0.000466	0.0260031
27	0.876891	0.754319	0.893182	0.817898	0.936878	0.0660574	0.0881948	0.0300342	0.00133091	0.036112
28	0.885814	0.70643	0.948864	0.809893	0.962326	0.077673	0.0647351	0.0283814	0.00086556	0.0461482
29	0.391156	0.364352	0.263185	0.305614	0.339827	0.190688	0.0220987	0.0360436	0.00037063	0.00588372
30	0.453852	0.448226	0.320062	0.373454	0.411688	0.161994	0.0269682	0.0533803	0.00018535	0.0221954
31	0.470418	0.759465	0.352637	0.481638	0.564334	0.1451	0.0362197	0.0351141	0.00123828	0.0168495
32	0.702516	0.663388	0.627715	0.645058	0.776089	0.162973	0.0287178	0.0245058	0.00134016	0.0266118
33	0.553726	0.426978	0.435367	0.431132	0.550473	0.204362	0.03852	0.0123989	0.00132321	0.0202401
34	0.767513	0.833333	0.664426	0.739356	0.872492	0.148601	0.04156	0.0261088	0.00195467	0.0217806
35	0.772899	0.77023	0.67425	0.719052	0.84425	0.15696	0.0279945	0.0325884	0.00387615	0.0313442
36	0.797598	0.696697	0.720497	0.708397	0.848939	0.0771516	0.0624307	0.0499268	0.00013302	0.0229238
37	0.750617	0.622285	0.682195	0.650864	0.785476	0.0699809	0.0686505	0.0637279	0.00057652	0.0490044
38	0.697339	0.820122	0.556936	0.663379	0.774342	0.0554283	0.0893554	0.0408397	0.00173876	0.0361747
39	0.811524	0.607397	0.884058	0.720067	0.904144	0.0742875	0.0846256	0.0347651	0.00201272	0.0580943
40	0.750436	0.48976	0.86646	0.625794	0.860922	0.10036	0.0954007	0.0180134	0.00135685	0.0410331
41	0.839877	0.719329	0.843685	0.77656	0.907076	0.0532621	0.0994433	0.0361167	0.00129147	0.0449789
42	0.85763	0.676538	0.92236	0.780552	0.945091	0.0636176	0.0660874	0.0391036	0.00086897	0.0691974
43	0.781656	0.628755	0.707729	0.665909	0.815379	0.083954	0.0681768	0.0440703	0.00030849	0.0251642
44	0.732295	0.554192	0.654589	0.600221	0.761289	0.07674	0.0645744	0.0668665	0.00035262	0.0487504
45	0.706483	0.787776	0.560386	0.654905	0.75868	0.0594907	0.0799814	0.0414031	0.00075892	0.042415
46	0.79675	0.55287	0.884058	0.680297	0.894391	0.075458	0.0758216	0.0320469	0.00318196	0.0584572
47	0.730183	0.432314	0.836957	0.570136	0.841864	0.106922	0.0872577	0.0174329	0.00111571	0.0436986
48	0.838409	0.683188	0.849034	0.757135	0.901781	0.0593547	0.0911344	0.0331076	0.00084097	0.0499712
49	0.843833	0.623558	0.914251	0.74143	0.934731	0.0739445	0.0612189	0.0363132	0.00190883	0.0683998
50	0.76144	0.855848	0.604421	0.70849	0.825688	0.0544954	0.0793578	0.0525688	9.17431e-05	0.0253211
51	0.703177	0.771144	0.541012	0.635897	0.733587	0.0404203	0.081024	0.0718022	0.00027528	0.0534502
52	0.577239	0.884337	0.426992	0.575912	0.723749	0.0343891	0.104569	0.0536645	0.00254085	0.0495466
53	0.81478	0.780399	0.750436	0.765125	0.874744	0.0398427	0.0904396	0.0376635	0.00123176	0.0660413
54	0.790092	0.685596	0.772542	0.726477	0.858316	0.0658584	0.104559	0.0238603	0.00174588	0.0495635
55	0.79685	0.850542	0.685282	0.759021	0.865416	0.0291217	0.112478	0.0379228	0.0028108	0.0545111
56	0.855337	0.840445	0.790576	0.814748	0.913009	0.0425824	0.0775388	0.0438139	0.00194202	0.0717128
Average	0.745989	0.695157	0.692899	0.675294	0.821315	0.0839352	0.066558	0.0372554	0.00105464	0.0507341
Std. Dev.	0.113317	0.13238	0.181147	0.115824	0.126137	0.037162	0.0277982	0.0154705	0.00081823	0.031608

## Sheet: Random Forest
Combination	Accuracy	Precision	Recall	F1	ROC	Mean	Std Dev	Skew	Kurt	Diameter
1	0.613813	0.596961	0.512422	0.551471	0.657954	0.167602	0.130312	0.110822	0.0472865	0.0937514
2	0.665134	0.631268	0.664596	0.647504	0.72917	0.157133	0.149555	0.127049	0.04273	0.105821
3	0.593137	0.78321	0.527329	0.63029	0.689446	0.15552	0.171303	0.120466	0.0503575	0.108083
4	0.813535	0.865672	0.612422	0.717352	0.867983	0.147947	0.138474	0.0703681	0.021068	0.0944054
5	0.804082	0.763198	0.628571	0.689373	0.791186	0.150851	0.128853	0.0445752	0.00535482	0.0633412
6	0.766023	0.809105	0.629193	0.707897	0.858806	0.122599	0.162028	0.066251	0.019348	0.0636835
7	0.828249	0.899911	0.625466	0.737999	0.932715	0.112389	0.140191	0.066962	0.0225249	0.0702135
8	0.780955	0.878676	0.648751	0.746408	0.84396	0.115145	0.0596023	0.0971537	0.0134244	0.0922637
9	0.56858	0.558695	0.622693	0.58896	0.623399	0.101832	0.0600748	0.118396	0.0102432	0.120657
10	0.620896	0.772787	0.635179	0.697259	0.678459	0.0952255	0.0610906	0.098661	0.011672	0.114782
11	0.764947	0.821145	0.560803	0.666452	0.837773	0.103645	0.0489874	0.0684775	0.00438408	0.130284
12	0.780029	0.769123	0.595005	0.670952	0.801242	0.124067	0.0695712	0.0515685	0.00258574	0.101429
13	0.729304	0.802534	0.584691	0.676508	0.833936	0.0931925	0.0639511	0.0755364	0.00755364	0.117475
14	0.781342	0.863749	0.567861	0.685228	0.888075	0.0945257	0.0363524	0.0907618	0.0123398	0.154414
15	0.807554	0.663793	0.84153	0.742169	0.936568	0.133295	0.110644	0.120377	0.0278712	0.0826402
16	0.616739	0.455607	0.852459	0.593833	0.878085	0.115575	0.116681	0.130177	0.0230089	0.103673
17	0.697091	0.667247	0.837158	0.742608	0.903429	0.04748	0.13842	0.0972875	0.00753248	0.0526427
18	0.896313	0.781155	0.842623	0.810726	0.97956	0.107886	0.102957	0.0664933	0.00355969	0.0909547
19	0.897475	0.734995	0.869945	0.796797	0.968719	0.131068	0.102922	0.0541449	0.00676811	0.0831311
20	0.861362	0.742938	0.862295	0.798179	0.970327	0.0969519	0.168933	0.085355	0.0131521	0.0873545
21	0.904556	0.809979	0.83388	0.821756	0.989992	0.0856908	0.126346	0.0526556	0.0030115	0.0716372
22	0.774135	0.614236	0.794318	0.692765	0.798464	0.157251	0.129997	0.124475	0.0459384	0.095013
23	0.605675	0.438107	0.820455	0.571203	0.797338	0.137884	0.134349	0.128032	0.0284515	0.0999337
24	0.670547	0.642727	0.803409	0.714141	0.787159	0.096383	0.145948	0.0871292	0.0143243	0.0577622
25	0.908059	0.809211	0.838636	0.823661	0.942697	0.136146	0.121839	0.0735864	0.0112544	0.0967786
26	0.88051	0.702463	0.810227	0.752507	0.88476	0.151685	0.111515	0.0543362	0.00876089	0.0817373
27	0.851214	0.729188	0.826136	0.77464	0.934383	0.0987534	0.120403	0.0694734	0.00692072	0.0586487
28	0.899214	0.797327	0.813636	0.805399	0.973159	0.125416	0.135438	0.0966243	0.0217302	0.110656
29	0.806265	0.791342	0.841262	0.815539	0.679622	0.209544	0.0896456	0.115682	0.0367385	0.0753764
30	0.691296	0.647401	0.862978	0.739805	0.638016	0.17673	0.0809972	0.11297	0.0196469	0.0735369
31	0.762626	0.820281	0.844881	0.832399	0.750002	0.147267	0.080444	0.0819476	0.0148151	0.0674421
32	0.907816	0.921754	0.858842	0.889186	0.909265	0.17513	0.0817977	0.0622218	0.0111521	0.0751448
33	0.896365	0.87434	0.856256	0.865204	0.804987	0.236315	0.110855	0.0739525	0.0269052	0.114188
34	0.858096	0.867092	0.84333	0.855046	0.941713	0.146647	0.108763	0.0850282	0.0181505	0.0853539
35	0.89971	0.923033	0.837125	0.877983	0.948491	0.155764	0.103316	0.0869981	0.0196679	0.098483
36	0.742494	0.606469	0.698758	0.649351	0.840139	0.128985	0.102603	0.113643	0.026471	0.0837583
37	0.59224	0.441286	0.73913	0.552632	0.8129	0.114196	0.12342	0.131181	0.0249235	0.0971218
38	0.630266	0.638812	0.712215	0.673519	0.801504	0.0798134	0.131298	0.0994487	0.0144614	0.0583545
39	0.858076	0.760045	0.704969	0.731472	0.940614	0.103014	0.104524	0.0561273	0.00347651	0.0838937
40	0.862129	0.715328	0.710145	0.712727	0.916916	0.150704	0.122912	0.0673279	0.0166097	0.10911
41	0.7972	0.690184	0.698758	0.694444	0.932608	0.110399	0.166065	0.0908038	0.0202627	0.102383
42	0.876385	0.821818	0.701863	0.757119	0.970679	0.106563	0.130894	0.101624	0.0236451	0.123759
43	0.744152	0.568608	0.695652	0.625747	0.802834	0.142479	0.114098	0.11758	0.0390463	0.0975276
44	0.580274	0.400393	0.737923	0.519116	0.780598	0.117292	0.123639	0.125843	0.026535	0.0891259
45	0.62605	0.60199	0.730676	0.66012	0.785769	0.0815415	0.129606	0.0788431	0.00590269	0.0532085
46	0.874151	0.738152	0.752415	0.745215	0.916994	0.0924588	0.130961	0.0547752	0.00431838	0.0737306
47	0.866512	0.67297	0.730676	0.700637	0.885198	0.156432	0.136116	0.066803	0.0220817	0.105527
48	0.816553	0.677928	0.727053	0.701632	0.915008	0.0998982	0.15673	0.0841854	0.0160669	0.0796707
49	0.876072	0.773031	0.699275	0.734306	0.954969	0.122256	0.132255	0.109803	0.039131	0.138345
50	0.679967	0.711538	0.559628	0.626506	0.809173	0.126743	0.145642	0.149771	0.0566055	0.118716
51	0.586678	0.563102	0.612565	0.586793	0.74305	0.0996513	0.149706	0.151266	0.0412002	0.126353
52	0.587407	0.747024	0.584061	0.655566	0.728743	0.0331187	0.167302	0.0918649	0.014588	0.053095
53	0.797708	0.848856	0.604421	0.706082	0.927439	0.061209	0.133693	0.0593614	0.00544817	0.0726739
54	0.785055	0.772549	0.573008	0.657983	0.906801	0.0897672	0.129922	0.0541222	0.00911736	0.0824442
55	0.734112	0.801303	0.572426	0.667798	0.911423	0.0750622	0.162335	0.101189	0.025205	0.112893
56	0.786985	0.860196	0.561955	0.679803	0.958512	0.0637078	0.142478	0.0972433	0.0206991	0.108895
Average	0.766127	0.726104	0.71632	0.710139	0.851656	0.120818	0.119264	0.0905143	0.0195719	0.0922014
Std. Dev.	0.107311	0.124814	0.109961	0.0855761	0.0972951	0.0373078	0.0320858	0.0271038	0.0133265	0.0229043

## Sheet: XGBoost
Combination	Accuracy	Precision	Recall	F1	ROC	Mean	Std Dev	Skew	Kurt	Diameter
1	0.535827	0.499072	0.501242	0.500155	0.540599	0.195673	0.147428	0.138117	0.0916062	0.166644
2	0.676919	0.641115	0.685714	0.662665	0.739733	0.11874	0.129605	0.103127	0.0262954	0.0739101
3	0.605392	0.795956	0.537888	0.641957	0.698155	0.116324	0.137426	0.080572	0.0295169	0.0928235
4	0.776338	0.822857	0.536646	0.649624	0.862013	0.12622	0.127869	0.0580666	0.0201725	0.081397
5	0.729108	0.632097	0.518634	0.569771	0.795452	0.153457	0.139611	0.0532587	0.0219982	0.0905012
6	0.72684	0.800759	0.524224	0.633634	0.85408	0.117647	0.163679	0.0707441	0.0289762	0.0883958
7	0.803988	0.925966	0.536025	0.678993	0.951655	0.113661	0.132604	0.0828425	0.0314311	0.0943876
8	0.737793	0.754982	0.69924	0.726043	0.827916	0.118144	0.0554043	0.0985376	0.0270794	0.126816
9	0.507141	0.50405	0.439197	0.469394	0.546346	0.102755	0.0553684	0.113551	0.0224242	0.139067
10	0.50597	0.735883	0.438654	0.54966	0.643775	0.0949172	0.0559813	0.097692	0.0186311	0.131122
11	0.704706	0.776758	0.413681	0.539851	0.795095	0.10884	0.0426972	0.0710984	0.00810102	0.162497
12	0.687129	0.620849	0.436482	0.512592	0.701886	0.126214	0.0484461	0.0632288	0.0192223	0.164707
13	0.672011	0.772978	0.456569	0.574061	0.790798	0.0952315	0.0601511	0.0787339	0.0202048	0.167246
14	0.716268	0.827283	0.408252	0.54671	0.84104	0.0928582	0.0345419	0.0886178	0.0151984	0.183715
15	0.592086	0.4427	0.92459	0.598726	0.823675	0.128163	0.0994514	0.105601	0.0415856	0.15714
16	0.701509	0.526217	0.921311	0.669845	0.873219	0.110531	0.122611	0.120664	0.0295133	0.114469
17	0.795208	0.746454	0.920219	0.824278	0.90622	0.0911514	0.126529	0.104524	0.019339	0.101858
18	0.910714	0.784572	0.911475	0.843276	0.968353	0.0999909	0.117835	0.070418	0.00625228	0.115644
19	0.85101	0.615989	0.943169	0.74525	0.964519	0.131488	0.114684	0.0650672	0.0197442	0.129901
20	0.896456	0.789671	0.919126	0.849495	0.971274	0.0933973	0.145072	0.0879321	0.0155958	0.102995
21	0.950115	0.886458	0.930055	0.907733	0.986663	0.0904818	0.114437	0.086649	0.0176583	0.145099
22	0.528233	0.369906	0.670455	0.476768	0.596857	0.133972	0.106233	0.0914351	0.0421397	0.150007
23	0.634049	0.458	0.780682	0.577311	0.738375	0.17844	0.184228	0.152861	0.0835432	0.177513
24	0.714203	0.707135	0.754545	0.730071	0.776435	0.107411	0.1353	0.0898758	0.0251838	0.11375
25	0.894385	0.792752	0.795455	0.794101	0.941073	0.1171	0.135918	0.0689388	0.0168588	0.107532
26	0.82879	0.588889	0.782955	0.672195	0.882297	0.174985	0.140454	0.0719978	0.0416608	0.152803
27	0.851214	0.746494	0.786364	0.76591	0.912997	0.119915	0.154563	0.0818065	0.0308327	0.126348
28	0.909117	0.865039	0.764773	0.811821	0.950707	0.113207	0.140176	0.0806797	0.026468	0.149241
29	0.592261	0.596491	0.615305	0.605752	0.620289	0.169933	0.0610146	0.086032	0.0195969	0.0687515
30	0.6203	0.616224	0.671665	0.642751	0.659027	0.155785	0.0846578	0.106112	0.0177008	0.0934618
31	0.672439	0.840637	0.654602	0.736047	0.7428	0.139395	0.074518	0.0804882	0.00849107	0.0590395
32	0.823425	0.885734	0.677353	0.767653	0.915476	0.155219	0.0868233	0.0626047	0.00962045	0.116403
33	0.742117	0.687428	0.616339	0.649945	0.795576	0.199412	0.0705219	0.045234	0.00592992	0.0874786
34	0.84039	0.931579	0.732161	0.819919	0.943539	0.140271	0.113092	0.0823754	0.0246661	0.122679
35	0.831068	0.933628	0.654602	0.769605	0.93738	0.139685	0.0843662	0.0682395	0.00866153	0.0939848
36	0.659838	0.500919	0.846791	0.629473	0.788411	0.115727	0.0989669	0.10176	0.0309493	0.10145
37	0.671958	0.511111	0.857143	0.640371	0.822648	0.108475	0.11934	0.116102710.02541133	0.0298018	0.0916227
38	0.751663	0.73893	0.829193	0.781463	0.830838	0.0898643	0.129983	0.0989398	0.0219678	0.0938507
39	0.905762	0.817	0.845756	0.831129	0.95775	0.108321	0.131696	0.0707653	0.0164219	0.131193
40	0.932935	0.901982	0.847826	0.874066	0.95775	0.0938944	0.12129	0.0833295	0.0190258	0.128379
41	0.877091	0.799407	0.837474	0.817998	0.940449	0.0952572	0.148163	0.0784235	0.0217769	0.107326
42	0.932935	0.901982	0.847826	0.874066	0.974407	0.0975074	0.125497	0.0831923	0.0198948	0.129522
43	0.637579	0.449454	0.794686	0.574171	0.758706	0.114054	0.0973954	0.0951038	0.0257371	0.0815301
44	0.64924	0.459699	0.812802	0.58726	0.777251	0.126019	0.12549	0.120245	0.0424472	0.120686
45	0.705882	0.682505	0.763285	0.720639	0.798092	0.0977317	0.134919	0.0997555	0.0239902	0.0837339
46	0.888331	0.76533	0.783816	0.774463	0.925863	0.103232	0.12846	0.0703668	0.011046	0.098959
47	0.823393	0.559801	0.81401	0.663386	0.890383	0.141788	0.125657	0.0640602	0.0150621	0.107526
48	0.86134	0.759717	0.778986	0.769231	0.915727	0.0984818	0.159695	0.0814412	0.0226176	0.110432
49	0.922212	0.890733	0.777778	0.830432	0.961132	0.100532	0.119893	0.0940326	0.0217698	0.121665
50	0.634766	0.598843	0.722513	0.654891	0.711423	0.150229	0.154771	0.149037	0.087844	0.185321
51	0.654682	0.61893	0.726585	0.668451	0.745427	0.0751514	0.132043	0.121307	0.0309231	0.106809
52	0.680876	0.815073	0.679465	0.741117	0.77006	0.134753	0.183511	0.154992	0.0902878	0.18465
53	0.851964	0.87656	0.735311	0.799747	0.935785	0.0674152	0.142884	0.0770798	0.0138336	0.115122
54	0.843409	0.776892	0.794066	0.785386	0.916879	0.0822018	0.130213	0.0577595	0.0129486	0.0912221
55	0.808528	0.861626	0.702734	0.774111	0.909488	0.0792554	0.168279	0.093079	0.0319786	0.13349
56	0.862594	0.936055	0.706806	0.805436	0.962145	0.0632342	0.131016	0.0957275	0.0242042	0.136131
Average	0.75217	0.716878	0.715437	0.698408	0.834748	0.118102	0.117008	0.0890567	0.0269005	0.11982
Std. Dev.	0.120973	0.151594	0.149548	0.112438	0.116498	0.0298507	0.035587	0.023993	0.0192603	0.0311348
